# Supplementary material
Source: publisher figshare collection journal article supplement (https://gsapubs.figshare.com/articles/dataset/_/14143979)
Supplement: Supplementary file 1 [file 1]

## Sheet: Sheet1
Table S1: Re and Os elemental abundance and isotopic composition data for isochron regression of the Agu Bay Fm
Sample	Re (ng/g)	±	Os (pg/g)	±	192Os (pg/g)	±	187Re/188Os	±	187Os/188Os	±	rhoa	Osib
A07	8.24987	0.0172183	271.843	1.25636	68.4661	0.14192	239.715	0.703963	5.02772	0.0143924	0.508008	0.647079
A08	9.59881	0.018593	289.954	1.42485	69.3946	0.149641	275.179	0.796302	5.68563	0.0172396	0.527037	0.656905
A09	2.95789	0.00645339	134.343	0.611569	38.7593	0.0970448	151.82	0.502402	3.43126	0.0116762	0.549979	0.65684
A10	3.12127	0.00656099	117.092	0.566451	31.4325	0.083046	197.549	0.663557	4.2514	0.0144839	0.600042	0.641312
A11	2.79052	0.00617568	142.522	0.598799	42.6708	0.0994752	130.1	0.416875	3.03227	0.00950654	0.534756	0.654769
A02	6.23619	0.0137218	215.879	1.0456	55.7242	0.129379	222.637	0.710789	4.72256	0.0152507	0.519255	0.653993
A04	9.31885	0.0181608	261.455	1.29679	59.5947	0.128388	311.084	0.901767	6.34682	0.0186576	0.540703	0.661938
Uncertainties are given as 2σ for 187Re/188Os and 187Os/188Os and 192Os and significant figures required for isochron replication.
The uncertainty includes the 2 SE uncertainty for mass spectrometer analysis plus uncertainties for Os blank abundance and isotopic composition.
a Rho is the associated error correlation (Ludwig, 1980).
b Osi = initial 187Os/188Os isotope ratio calculated at 1087 Ma.

## Sheet: G48521
Greenman, J.W., et al., 2021, Re-Os geochronology highlights widespread latest Mesoproterozoic (ca. 1090–1050 Ma) cratonic basin development on northern Laurentia: Geology, v. 49, https://doi.org/10.1130/G48521.1
